# Supplementary material for: Are invasive populations characterized by a broader diet than native populations?
Source: PeerJ. 2017 May 16;5:e3250. doi: 10.7717/peerj.3250 (PMC5436557; doi:10.7717/peerj.3250)
Supplement: Table S1 — Electivity values were calculated following the Vanderploeg and Scavia’s formula (1979) for each prey category detected in the diet of Xenopus laevis and in its environment. [file peerj-05-3250-s002.xlsx]

## Sheet: Tab. S4
Country	Taxa	Availability	Eaten Item	Eaten item/Availability	W	E*
France	Diptera	19.1205	20.879	1.09197	0.213574	0.315577
France	Gastropoda	6.97053	9.818	1.4085	0.275483	0.42518
France	Coleoptera	5.57695	1.756	0.314867	0.0615837	-0.286792
France	Hemiptera	8.84358	1.119	0.126532	0.024748	-0.635681
France	Ephemeroptera	6.23263	2.781	0.4462	0.0872706	-0.120175
France	Odonata	11.2803	1.129	0.100086	0.0195754	-0.700422
France	Trichoptera	1.81556	0.016	0.00881272	0.00172365	-0.969448
France	Crustacia	8.31283	3.092	0.371955	0.0727492	-0.208647
France	Zooplankton	31.8471	39.615	1.24391	0.243292	0.372967
South Africa	Acari	24	184	7.66667	0.218527	0.627598
South Africa	Amphipoda	503	65	0.129225	0.00368335	-0.862775
South Africa	Nematocera	51	76	1.4902	0.0424758	-0.0813643
South Africa	Trichoptera	29	21	0.724138	0.0206405	-0.41562
South Africa	Anisoptera	38	28	0.736842	0.0210026	-0.4084
South Africa	Anura	793	1195	1.50694	0.0429529	-0.0758136
South Africa	Coleoptera	269	91	0.33829	0.00964244	-0.676658
South Africa	Heteroptera	227	38	0.167401	0.00477151	-0.825767
South Africa	Zygoptera	2368	29	0.0122466	0.000349071	-0.986134
South Africa	Daphnia	99	440	4.44444	0.126682	0.434012
South Africa	Ostracoda	173	1534	8.86705	0.252742	0.669686
South Africa	Hymenoptera	1	9	9	0.256531	0.673769
Wales	Diptera	5213	5206	0.998657	0.339463	0.781352
Wales	Oligochaeta	3974	205	0.0515853	0.0175349	-0.407621
Wales	Bivalvia	199	0	0	0	-1
Wales	Zooplankton	1793.53	63164	35.2178	11.9712	0.993063
